# Supplementary material for: Reef Fish Diversity Across the Temperate South Pacific Ocean
Source: Frontiers journal article supplement (doi:10.3389/fevo.2022.768707), 2022-03-24
Supplement: Table_1.docx [file Table_1.docx]

Table S1. List of Order, Family and fish species traits used to determine the functional diversity. Specifically, coarse dietary groups reflect the trophic position of each species, fine-scale classes designate a potential preference for a prey type or group, specifically feeding behaviors and modes of foraging. For example, a carnivore may be suited only for soft shelled prey while other carnivore for hard shelled prey with a pharyngeal teeth and hard mandibles to crush upon those kinds of prey (Edgar, 1997; Perez-Matus et al., 2012; Reyes and Hüne, 2012; Ramírez et al., 2013; Stuart-Smith et al., 2013; Francis, 2015a; Soler et al., 2015; Edgar et al., 2020). We assembled the data from range of available sources to assign fish species to feeding trophic groups and fine feeding guilds. Dietary information was obtained for all fish species in our data set and were complemented with the information with other traits such as trophic level and maximum body size (cm, maximum total length [TL]). We compiled other categorical traits such as habitat preference using water column position such as benthic (sedentary in the bottom), demersal (swimming near the bottom), pelagic species (including species with a high site fidelity or species that migrate seasonally to a reefs). Gregariousness based on species mainly solitary, pairing species (that may form schools occasionally) and schooling species. We also accounted for species that are active during the day (diurnal) or at night (nocturnal) or both. These data was extracted from FishBase (Froese and Pauly, 2014).

| **Order** | **Family** | **Species** | | **Trophic Group** | **Trophic category** | **Fine Trophic Group** | **Trophic Level** | **Body Size (cm)** | **Water-Column Position** | **Active Period** | **Gregariousness** |
| --- | --- | --- | --- | --- | --- | --- | --- | --- | --- | --- | --- |
| Tetraodontiformes | Monacanthidae | Acanthaluteres | pilomelanurus | Carnivore | Omnivore | Invertivore+Algae | 2.9 | 14 | Demersal | Diurnal | Solitary |
| Tetraodontiformes | Monacanthidae | Acanthaluteres | vittiger | Carnivore | Sessile Invertivore | GeneralInvertivore | 2 | 35 | Demersal | Diurnal | Solitary |
| Perciformes | Serranidae | Acanthistius | pictus | Carnivore | General Carnivore | Invertivore+Piscivore | 4.4 | 47 | Demersal | Diurnal | Solitary |
| Perciformes | Chaetodontidae | Amphichaetodon | howensis | Carnivore | Mobile Invertivore | InvertivoreSoft | 2.76 | 18 | Demersal | Diurnal | Pairing |
| Perciformes | Chaetodontidae | Amphichaetodon | melbae | Carnivore | Mobile Invertivore | InvertivoreSoft | 3.4 | 14.5 | Demersal | Diurnal | Pairing |
| Perciformes | Haemulidae | Anisotremus | scapularis | Herbivore | Herbivore and Detritivore | Grazer | 3.27 | 40 | Demersal | Diurnal | Schooling |
| Perciformes | Aplodactylidae | Aplodactylus | actidens | Herbivore | Herbivore and Detritivore | Browser | 2.51 | 65 | Demersal | Diurnal | Pairing |
| Perciformes | Aplodactylidae | Aplodactylus | punctatus | Herbivore | Herbivore and Detritivore | Browser | 2 | 43.7 | Demersal | Diurnal | Pairing |
| Tetraodontiformes | Aracanidae | Aracana | aurita | Carnivore | Mobile Invertivore | InvertivoreSoft | 3.3 | 20 | Demersal | Diurnal | Solitary |
| Tetraodontiformes | Aracanidae | Aracana | ornata | Carnivore | Mobile Invertivore | InvertivoreSoft | 3.3 | 15 | Demersal | Diurnal | Solitary |
| Perciformes | Arripidae | Arripsis | trutta | Carnivore | General Carnivore | Piscivore | 4.1 | 39 | Demersal | Diurnal | Schooling |
| Perciformes | Labridae | Bodianus | unimaculatus | Carnivore | Mobile Invertivore | InvertivoreHard | 3.6 | 50 | Demersal | Diurnal | Pairing |
| Perciformes | Bovichtidae | Bovichtus | angustifrons | Carnivore | Mobile Invertivore | GeneralInvertivore | 3.7 | 28 | Demersal | Diurnal | Solitary |
| Perciformes | Serranidae | Caesioperca | lepidoptera | Planktivore | Planktivore | DiurnalPlanktivore | 3.1 | 30 | Pelagic Mobile | Diurnal | Schooling |
| Perciformes | Serranidae | Caesioperca | rasor | Planktivore | Planktivore | DiurnalPlanktivore | 3.6 | 25 | Pelagic SA | Diurnal | Schooling |
| Perciformes | Callanthiidae | Callanthias | platei | Carnivore | General Carnivore | Piscivore | 3.5 | 45 | Pelagic SA | Diurnal | Schooling |
| Perciformes | Serranidae | Caprodon | longimanus | Carnivore | General Carnivore | Piscivore | 3.92 | 55 | Pelagic Mobile | Diurnal | Schooling |
| Beryciformes | Berycidae | Centroberyx | affinis | Carnivore | General Carnivore | Invertivore+Piscivore | 3.81 | 51 | Demersal | Nocturnal | Schooling |
| Carcharhiniformes | Scyliorhinidae | Cephaloscyllium | laticeps | Carnivore | General Carnivore | Invertivore+Piscivore | 4.3 | 150 | Benthic | Nocturnal | Solitary |
| Perciformes | Cheilodactylidae | Cheilodactylus | nigripes | Carnivore | Mobile Invertivore | InvertivoreSoft | 3.1 | 41 | Demersal | Diurnal | Pairing |
| Perciformes | Cheilodactylidae | Cheilodactylus | spectabilis | Carnivore | General Carnivore | GeneralInvertivore | 3.4 | 100 | Demersal | Diurnal | Pairing |
| Perciformes | Cheilodactylidae | Cheilodactylus | variegatus | Carnivore | Mobile Invertivore | GeneralInvertivore | 3.35 | 44 | Demersal | Diurnal | Pairing |
| Perciformes | Chironemidae | Chironemus | bicornis | Carnivore | Mobile Invertivore | GeneralInvertivore | 3.5 | 50 | Benthic | Diurnal | Solitary |
| Perciformes | Chironemidae | Chironemus | delfini | Carnivore | Mobile Invertivore | InvertivoreSoft | 3.5 | 40 | Benthic | Diurnal | Solitary |
| Perciformes | Chironemidae | Chironemus | marmolatus | Carnivore | Mobile Invertivore | InvertivoreSoft | 3.7 | 40 | Demersal | Diurnal | Solitary |
| Perciformes | Pomacentridae | Chromis | crusma | Planktivore | Planktivore | Zooplanktivore | 3 | 14 | Pelagic SA | Diurnal | Schooling |
| Perciformes | Pomacentridae | Chromis | dispilus | Planktivore | Planktivore | Zooplanktivore | 3 | 21 | Pelagic SA | Diurnal | Schooling |
| Perciformes | Pomacentridae | Chromis | fumea | Planktivore | Planktivore | Zooplanktivore | 3.4 | 10 | Pelagic SA | Diurnal | Schooling |
| Anguilliformes | Congridae | Conger | verreauxi | Carnivore | General Carnivore | Invertivore+Piscivore | 4.2 | 200 | Demersal | Diurnal | Schooling |
| Perciformes | Labridae | Coris | picta | Carnivore | Mobile Invertivore | InvertivoreSoft | 3.4 | 25 | Demersal | Diurnal | Pairing |
| Perciformes | Labridae | Coris | sandayeri | Carnivore | Mobile Invertivore | GeneralInvertivore | 3.6 | 25 | Demersal | Diurnal | Solitary |
| Perciformes | Labridae | Dotalabrus | aurantiacus | Carnivore | Mobile Invertivore | InvertivoreSoft | 3.4 | 12 | Demersal | Diurnal | Solitary |
| Perciformes | Carangidae | Decapterus | koheru | Carnivore | General Carnivore | Piscivore | 4.4 | 40 | Demersal | Diurnal | Schooling |
| Perciformes | Dinolestidae | Dinolestes | lewini | Carnivore | General Carnivore | Piscivore | 3.7 | 84 | Demersal | Diurnal | Schooling |
| Tetraodontiformes | Diodontidae | Diodon | nicthemerus | Carnivore | Sessile Invertivore | InvertivoreSoft | 3.8 | 40 | Demersal | Nocturnal | Schooling |
| Perciformes | Labridae | Eupetrichthys | angustipes | Carnivore | Mobile Invertivore | InvertivoreSoft | 3.4 | 12.4 | Demersal | Diurnal | Solitary |
| Perciformes | Tripterygiidae | Forsterygion | flavonigrum | Carnivore | Mobile Invertivore | InvertivoreSoft | 3.28 | 5 | Demersal | Diurnal | Solitary |
| Perciformes | Tripterygiidae | Forsterygion | lapillum | Carnivore | Mobile Invertivore | InvertivoreSoft | 3.2 | 6.69 | Demersal | Diurnal | Solitary |
| Perciformes | Tripterygiidae | Forsterygion | malcolmi | Carnivore | Mobile Invertivore | GeneralInvertivore | 3.44 | 12.2 | Demersal | Diurnal | Solitary |
| Perciformes | Tripterygiidae | Forsterygion | maryannae | Planktivore | Planktivore | DiurnalPlanktivore | 3.3 | 5.88 | Demersal | Diurnal | Schooling |
| Perciformes | Tripterygiidae | Forsterygion | varium | Carnivore | Mobile Invertivore | GeneralInvertivore | 3.5 | 13 | Demersal | Diurnal | Solitary |
| Perciformes | Girellidae | Girella | albostriata | Omnivore | Omnivore | Invertivore+Algae | 2 | 60 | Demersal | Diurnal | Schooling |
| Perciformes | Kyphosidae | Girella | laevifrons | Omnivore | Omnivore | Invertivore+Algae | 2.6 | 38.3 | Demersal | Diurnal | Schooling |
| Perciformes | Girellidae | Girella | atricuspidata | Omnivore | Omnivore | Invertivore+Algae | 2.47 | 71 | Demersal | Diurnal | Schooling |
| Perciformes | Kyphosidae | Graus | nigra | Carnivore | Mobile Invertivore | GeneralInvertivore | 3.4 | 64.6 | Demersal | Nocturnal | Solitary |
| Anguilliformes | Muraenidae | Gymnothorax | prasinus | Carnivore | General Carnivore | Invertivore+Piscivore | 4.5 | 91.5 | Demersal | Nocturnal | Solitary |
| Anguilliformes | Muraenidae | Gymnothorax | porphyreus | Carnivore | General Carnivore | Invertivore+Piscivore | 4.1 | 103 | Demersal | Nocturnal | Solitary |
| Perciformes | Serranidae | Hemilutjanus | macrophtalmos | Carnivore | General Carnivore | Invertivore+Piscivore | 4.3 | 50 | Demersal | Nocturnal | Solitary |
| Perciformes | Clinidae | Heteroclinus | johnstoni | Carnivore | Mobile Invertivore | InvertivoreSoft | 3.9 | 40 | Demersal | Diurnal | Solitary |
| Perciformes | Odacidae | Heteroscarus | acroptilus | Herbivore | Herbivore and Detritivore | Grazer | 2.9 | 24 | Demersal | Diurnal | Pairing |
| Perciformes | Serranidae | Hyploplectrodes | huntii | Carnivore | General Carnivore | Invertivore+Piscivore | 4.1 | 20 | Demersal | Diurnal | Solitary |
| Perciformes | Serranidae | Hyploplectrodes | maccullochi | Carnivore | General Carnivore | Invertivore+Piscivore | 3.55 | 45 | Demersal | Diurnal | Solitary |
| Perciformes | Serranidae | Hyploplectrodes | semicinctum | Carnivore | General Carnivore | Invertivore+Piscivore | 3.9 | 35 | Demersal | Diurnal | Solitary |
| Perciformes | Haemulidae | Isacia | conceptionis | Omnivore | Omnivore | Invertivore+Algae | 2.91 | 60 | Pelagic SA | Diurnal | Schooling |
| Perciformes | Tripterygiidae | Karalepis | stewarti | Carnivore | Mobile Invertivore | GeneralInvertivore | 3.33 | 15 | Benthic | Nocturnal | Solitary |
| Perciformes | Kyphosidae | Kyphosus | sydneyanus | Omnivore | Omnivore | Invertivore+Algae | 2 | 80 | Demersal | Diurnal | Schooling |
| Perciformes | Labrisomidae | Labiromus | philippii | Carnivore | General Carnivore | Invertivore+Piscivore | 3.7 | 35 | Benthic | Nocturnal | Solitary |
| Perciformes | Latridae | Latridopsis | ciliaris | Carnivore | General Carnivore | GeneralInvertivore | 3.3 | 80 | Demersal | Diurnal | Pairing |
| Perciformes | Latridae | Latridopsis | forsteri | Carnivore | General Carnivore | Invertivore+Piscivore | 3.6 | 65 | Demersal | Diurnal | Solitary |
| Gadiformes | Moridae | Lotella | fernandeziana | Carnivore | General Carnivore | Invertivore+Piscivore | 3.5 | 65 | Demersal | Both | Solitary |
| Perciformes | Labridae | Malapterus | reticulatus | Carnivore | General Carnivore | GeneralInvertivore | 3.5 | 30 | Demersal | Diurnal | Solitary |
| Perciformes | Kyphosidae | Medialuna | ancietae | Omnivore | Omnivore | Invertivore+Algae | 3.1 | 40 | Demersal | Diurnal | Pairing |
| Perciformes | Latridae | Mendosoma | lineatum | Carnivore | Mobile Invertivore | InvertivoreSoft | 3.94 | 40 | Demersal | Diurnal | Solitary |
| Tetraodontiformes | Monacanthidae | Meuschenia | australis | Carnivore | Sessile Invertivore | GeneralInvertivore | 2.8 | 30 | Demersal | Diurnal | Solitary |
| Tetraodontiformes | Monacanthidae | Meuschenia | flavolineata | Carnivore | Sessile Invertivore | GeneralInvertivore | 2.8 | 30 | Demersal | Diurnal | Solitary |
| Tetraodontiformes | Monacanthidae | Meuschenia | freycineti | Carnivore | Sessile Invertivore | GeneralInvertivore | 2 | 60 | Demersal | Diurnal | Solitary |
| Tetraodontiformes | Monacanthidae | Meuschenia | scaber | Carnivore | Sessile Invertivore | GeneralInvertivore | 3.1 | 31 | Demersal | Diurnal | Solitary |
| Tetraodontiformes | Monacanthidae | Meuschenia | verreauxi | Carnivore | Mobile Invertivore | InvertivoreSoft | 2.9 | 21 | Demersal | Diurnal | Solitary |
| Mugiliformes | Mugilidae | Mugil | cephalus | Planktivore | Planktivore | Zooplanktivore | 2.5 | 100 | Pelagic Mobile | Diurnal | Solitary |
| Rajiformes | Myliobatidae | Myliobatis | tenuicaudatus | Carnivore | Mobile Invertivore | InvertivoreSoft | 3.5 | 150 | Demersal | Both | Solitary |
| Perciformes | Cheilodactylidae | Nemadactylus | douglasii | Carnivore | Mobile Invertivore | InvertivoreSoft | 3.35 | 81 | Demersal | Diurnal | Solitary |
| Perciformes | Cheilodactylidae | Nemadactylus | gayi | Carnivore | Mobile Invertivore | GeneralInvertivore | 3.4 | 40 | Demersal | Diurnal | Solitary |
| Perciformes | Cheilodactylidae | Nemadactylus | macropterus | Carnivore | General Carnivore | GeneralInvertivore | 3.41 | 70 | Demersal | Diurnal | Solitary |
| Perciformes | Odacidae | Neodax | balteatus | Omnivore | Omnivore | Invertivore+Algae | 2.8 | 14 | Demersal | Diurnal | Pairing |
| Perciformes | Gobiidae | Nesogobius | pulchellus | Carnivore | Mobile Invertivore | InvertivoreSoft | 3.3 | 7 | Benthic | Diurnal | Solitary |
| Perciformes | Pomacentridae | Nexilosus | latifrons | Carnivore | General Carnivore | GeneralInvertivore | 3.5 | 30 | Demersal | Diurnal | Solitary |
| Perciformes | Tripterygiidae | Notoclinops | caerulepunctus | Carnivore | Mobile Invertivore | InvertivoreSoft | 3.1 | 3.6 | Benthic | Diurnal | Solitary |
| Perciformes | Tripterygiidae | Notoclinops | segmentatus | Carnivore | Mobile Invertivore | InvertivoreSoft | 3.3 | 4.4 | Benthic | Diurnal | Solitary |
| Perciformes | Tripterygiidae | Notoclinops | yaldwyni | Carnivore | Mobile Invertivore | InvertivoreSoft | 3.2 | 5.22 | Demersal | Diurnal | Solitary |
| Perciformes | Labridae | Notolabrus | celidotus | Carnivore | Mobile Invertivore | InvertivoreSoft | 3.4 | 23.9 | Demersal | Diurnal | Pairing |
| Perciformes | Labridae | Notolabrus | fucicola | Carnivore | Mobile Invertivore | GeneralInvertivore | 3.43 | 38 | Demersal | Diurnal | Pairing |
| Perciformes | Labridae | Notolabrus | inscriptus | Carnivore | General Carnivore | Invertivore+Piscivore | 3.7 | 50 | Demersal | Diurnal | Pairing |
| Perciformes | Labridae | Notolabrus | tetricus | Carnivore | Mobile Invertivore | GeneralInvertivore | 3.6 | 50 | Demersal | Diurnal | Pairing |
| Perciformes | Odacidae | Odax | pullus | Herbivore | Herbivore and Detritivore | Browser | 2.73 | 40 | Demersal | Diurnal | Pairing |
| Perciformes | Odacidae | Olisthops | cyanomelas | Herbivore | Herbivore and Detritivore | Browser | 2.7 | 35 | Demersal | Diurnal | Pairing |
| Perciformes | Oplegnathidae | Oplegnathus | insignis | Carnivore | General Carnivore | GeneralInvertivore | 3.12 | 66 | Demersal | Diurnal | Solitary |
| Beryciformes | Trachichthyidae | Optivus | elongatus | Carnivore | Mobile Invertivore | InvertivoreSoft | 3.5 | 72 | Demersal | Nocturnal | Pairing |
| Perciformes | Sparidae | Pagrus | auratus | Carnivore | General Carnivore | Invertivore+Piscivore | 3.6 | 130 | Pelagic SA | Diurnal | Pairing |
| Perciformes | Serranidae | Paralabrax | humeralis | Carnivore | General Carnivore | Invertivore+Piscivore | 3.87 | 54.5 | Demersal | Nocturnal | Pairing |
| Pleuronectiformes | Paralichthyidae | Paralichthys | adpersus | Carnivore | General Carnivore | Piscivore | 4.17 | 41 | Benthic | Both | Solitary |
| Perciformes | Pinguipedidae | Parapercis | colias | Carnivore | General Carnivore | GeneralInvertivore | 3.9 | 45 | Demersal | Both | Pairing |
| Perciformes | Pinguipedidae | Parapercis | dockinsi | Carnivore | General Carnivore | InvertivoreHard | 3.5 | 17.2 | Demersal | Diurnal | Pairing |
| Beryciformes | Trachichthyidae | Paratrachichthys | fernandezianus | Carnivore | General Carnivore | Piscivore | 3.6 | 25 | Demersal | Nocturnal | Schooling |
| Perciformes | Gobiidae | Paratrimma | nigrimenta | Carnivore | Mobile Invertivore | InvertivoreSoft | 3.3 | 5 | Benthic | Diurnal | Schooling |
| Perciformes | Pomacentridae | Parma | alboscapularis | Herbivore | Herbivore and Detritivore | Grazer | 2 | 22 | Demersal | Diurnal | Pairing |
| Perciformes | Pempheridae | Pempheris | adspersa | Carnivore | Mobile Invertivore | InvertivoreSoft | 3 | 15.8 | Demersal | Nocturnal | Schooling |
| Perciformes | Pempheridae | Pempheris | affinis | Carnivore | Mobile Invertivore | InvertivoreSoft | 3.4 | 15 | Demersal | Nocturnal | Schooling |
| Perciformes | Pempheridae | Pempheris | analis | Carnivore | Mobile Invertivore | InvertivoreSoft | 3.4 | 20 | Demersal | Nocturnal | Schooling |
| Perciformes | Pentacerotidae | Pentaceropsis | recurvirostris | Omnivore | Omnivore | Invertivore+Algae | 3.1 | 50 | Demersal | Diurnal | Pairing |
| Perciformes | Labridae | Pictilabrus | laticlavius | Carnivore | Mobile Invertivore | InvertivoreSoft | 3.5 | 23 | Demersal | Diurnal | Pairing |
| Perciformes | Pinguipedidae | Pinguipes | chilensis | Carnivore | General Carnivore | Invertivore+Piscivore | 3.18 | 51 | Demersal | Diurnal | Pairing |
| Perciformes | Pomatomidae | Pomatomus | saltatrix | Carnivore | General Carnivore | Piscivore | 4.8 | 130 | Pelagic Mobile | Diurnal | Schooling |
| Perciformes | Pinguipedidae | Prolatilus | jugularis | Carnivore | General Carnivore | Invertivore+Piscivore | 3.7 | 40 | Demersal | Diurnal | Pairing |
| Perciformes | Carangidae | Pseudocaranx | chilensis | Carnivore | General Carnivore | Piscivore | 3.6 | 65 | Pelagic Mobile | Diurnal | Schooling |
| Perciformes | Carangidae | Pseudocaranx | dentex | Carnivore | General Carnivore | Piscivore | 3.66 | 122 | Pelagic Mobile | Diurnal | Schooling |
| Perciformes | Labridae | Pseudolabrus | gayi | Carnivore | Mobile Invertivore | InvertivoreSoft | 3.3 | 15 | Demersal | Diurnal | Schooling |
| Perciformes | Labridae | Pseudolabrus | luculentus | Carnivore | Mobile Invertivore | InvertivoreSoft | 3.3 | 17 | Demersal | Diurnal | Pairing |
| Perciformes | Labridae | Pseudolabrus | miles | Carnivore | Mobile Invertivore | GeneralInvertivore | 3.6 | 27.2 | Demersal | Diurnal | Solitary |
| Perciformes | Labridae | Pseudolabrus | rubidundus | Carnivore | Mobile Invertivore | InvertivoreSoft | 3.3 | 20 | Demersal | Diurnal | Pairing |
| Gadiformes | Moridae | Pseudophycis | barbata | Carnivore | General Carnivore | Invertivore+Piscivore | 3.5 | 63 | Demersal | Diurnal | Solitary |
| Perciformes | Tripterygiidae | Ruanoho | decemdigitatus | Carnivore | Mobile Invertivore | InvertivoreSoft | 3.3 | 12 | Benthic | Diurnal | Solitary |
| Perciformes | Tripterygiidae | Ruanoho | whero | Carnivore | Mobile Invertivore | InvertivoreSoft | 3.3 | 9 | Benthic | Diurnal | Solitary |
| Perciformes | Blenniidae | Scarthichtys | variolatus | Herbivore | Herbivore and Detritivore | Grazer | 2.6 | 16.3 | Demersal | Diurnal | Pairing |
| Perciformes | Blenniidae | Scarthichtys | viridis | Herbivore | Herbivore and Detritivore | Grazer | 2.2 | 25 | Demersal | Diurnal | Pairing |
| Scorpaeniformes | Scorpaenidae | Scorpaena | cardinalis | Carnivore | General Carnivore | Invertivore+Piscivore | 3.5 | 18 | Benthic | Both | Solitary |
| Scorpaeniformes | Scorpaenidae | Scorpaena | fernandeziana | Carnivore | General Carnivore | InvertivoreSoft | 3.7 | 35 | Benthic | Both | Solitary |
| Scorpaeniformes | Scorpaenidae | Scorpaena | papillosa | Carnivore | Mobile Invertivore | InvertivoreSoft | 4 | 30 | Benthic | Nocturnal | Solitary |
| Scorpaeniformes | Scorpaenidae | Scorpaena | thomsoni | Carnivore | Mobile Invertivore | InvertivoreSoft | 3.7 | 20 | Benthic | Nocturnal | Solitary |
| Perciformes | Kyphosidae | Scorpis | chilensis | Omnivore | Omnivore | Invertivore+Algae | 3.1 | 30 | Pelagic SA | Diurnal | Schooling |
| Perciformes | Kyphosidae | Scorpis | lineolata | Planktivore | Planktivore | DiurnalPlanktivore | 3.1 | 30 | Pelagic Mobile | Diurnal | Schooling |
| Perciformes | Kyphosidae | Scorpis | violacea | Planktivore | Planktivore | DiurnalPlanktivore | 3.1 | 40 | Pelagic Mobile | Diurnal | Schooling |
| Scorpaenidae | Sebastidae | Sebastes | oculatus | Carnivore | General Carnivore | Invertivore+Piscivore | 3.7 | 40.8 | Demersal | Both | Pairing |
| Perciformes | Labridae | Semicossyphus | darwini | Carnivore | General Carnivore | GeneralInvertivore | 3.37 | 70 | Demersal | Diurnal | Pairing |
| Perciformes | Carangidae | Seriola | lalandi | Carnivore | General Carnivore | Piscivore | 3.85 | 250 | Pelagic Mobile | Diurnal | Schooling |
| Perciformes | Odacidae | Siphonognathus | attenuatus | Omnivore | Omnivore | BenthicOmnivore | 2.8 | 12 | Demersal | Diurnal | Pairing |
| Rajiformes | Rajidae | Sympterygia | brevicaudata | Carnivore | Mobile Invertivore | InvertivoreSoft | 3.7 | 38 | Demersal | Both | Solitary |
| Beryciformes | Trachichthyidae | Trachinops | australis | Carnivore | Mobile Invertivore | InvertivoreSoft | 3.6 | 15 | Demersal | Nocturnal | Pairing |
| Perciformes | Plesiopidae | Trachinops | caudimaculatus | Carnivore | Mobile Invertivore | InvertivoreSoft | 4 | 15 | Demersal | Diurnal | Schooling |
| Perciformes | Plesiopidae | Trachinops | noarlungae | Carnivore | Mobile Invertivore | InvertivoreSoft | 4.1 | 15 | Demersal | Diurnal | Schooling |
| Perciformes | Carangidae | Trachurus | murphyi | Carnivore | General Carnivore | Piscivore | 3.49 | 70 | Pelagic Mobile | Diurnal | Schooling |
| Perciformes | Mullidae | Upeneichthys | lineatus | Carnivore | Mobile Invertivore | InvertivoreSoft | 3.4 | 40 | Demersal | Diurnal | Pairing |
| Perciformes | Mullidae | Upeneus | francisi | Carnivore | Mobile Invertivore | InvertivoreSoft | 3.3 | 7.22 | Demersal | Diurnal | Pairing |
| Rajiformes | Urolophidae | Urolophidae | cruciatus | Carnivore | General Carnivore | GeneralInvertivore | 3.4 | 50 | Demersal | Both | Solitary |

**References**

Edgar, G.J. (1997). *Australian Marine Life: the Plants and Animals of Temperate Waters.* Melbourne Reed Books

Edgar, G.J., Cooper, A., Baker, S.C., Barker, W., Barrett, N.S., Becerro, M.A., Bates, A.E., Brock, D., Ceccarelli, D.M., Clausius, E., Davey, M., Davis, T.R., Day, P.B., Green, A., Griffiths, S.R., Hicks, J., Hinojosa, I.A., Jones, B.K., Kininmonth, S., Larkin, M.F., Lazzari, N., Lefcheck, J.S., Ling, S.D., Mooney, P., Oh, E., Pérez-Matus, A., Pocklington, J.B., Riera, R., Sanabria-Fernandez, J.A., Seroussi, Y., Shaw, I., Shields, D., Shields, J., Smith, M., Soler, G.A., Stuart-Smith, J., Turnbull, J., and Stuart-Smith, R.D. (2020). Reef Life Survey: Establishing the ecological basis for conservation of shallow marine life. *Biological Conservation* 252.

Francis, M.P. (2015). *Coastal fishes of New Zealand.* Auckland Heinemann-Reed.

Froese, R., and Pauly, D. (2014). *Fishbase* [Online]. www.fishbase.org. [Accessed June 15 2018].

Perez-Matus, A., Pledger, S., Díaz, F.J., Ferry, L.A., and Vásquez, J.A. (2012). Plasticity in feeding selectivity and trophic structure of kelp forest

associated fi shes from northern Chile. *Revista Chilena de Historia Natural* 85**,** 29-48.

Ramírez, F., Pérez-Matus, A., Eddy, T.D., and Landaeta, M.F. (2013). Trophic ecology of abundant reef fish in a remote oceanic island: coupling diet and feeding morphology at the Juan Fernandez Archipelago, Chile. *Journal of the Marine Biological Association of the United Kingdom* 93**,** 1457-1469.

Reyes, P., and Hüne, M. (2012). *Peces del Sur de Chile.* Santiago de Chile: Ocho Libros Ediciones.

Soler, G.A., Edgar, G.J., Thomson, R.J., Kininmonth, S., Campbell, S.J., Dawson, T.P., Barrett, N.S., Bernard, A.T.F., Galván, D.E., Willis, T.J., Alexander, T.J., and Stuart-Smith, R.D. (2015). Reef Fishes at All Trophic Levels Respond Positively to Effective Marine Protected Areas. *PLoS ONE* 10**,** e0140270-0140212.

Stuart-Smith, R.D., Bates, A.E., Lefcheck, J.S., Duffy, J.E., Baker, S.C., Thomson, R.J., Stuart-Smith, J.F., Hill, N.A., Kininmonth, S.J., Airoldi, L., Becerro, M.A., Campbell, S.J., Dawson, T.P., Navarrete, S.A., Soler, G.A., Strain, E.M.A., Willis, T.J., and Edgar, G.J. (2013). Integrating abundance and functional traits reveals new global hotspots of fish diversity. *Nature* 501**,** 539-542.
